# Supplementary material for: The presence, role and clinical use of spermatozoal RNAs
Source: Oxford University Press journal article supplement (doi:10.1093/humupd/dmt031), 2013-07-14
Supplement: dmt031_Supplementary_Data.zip [file dmt031_Supplementary_Data.zip]

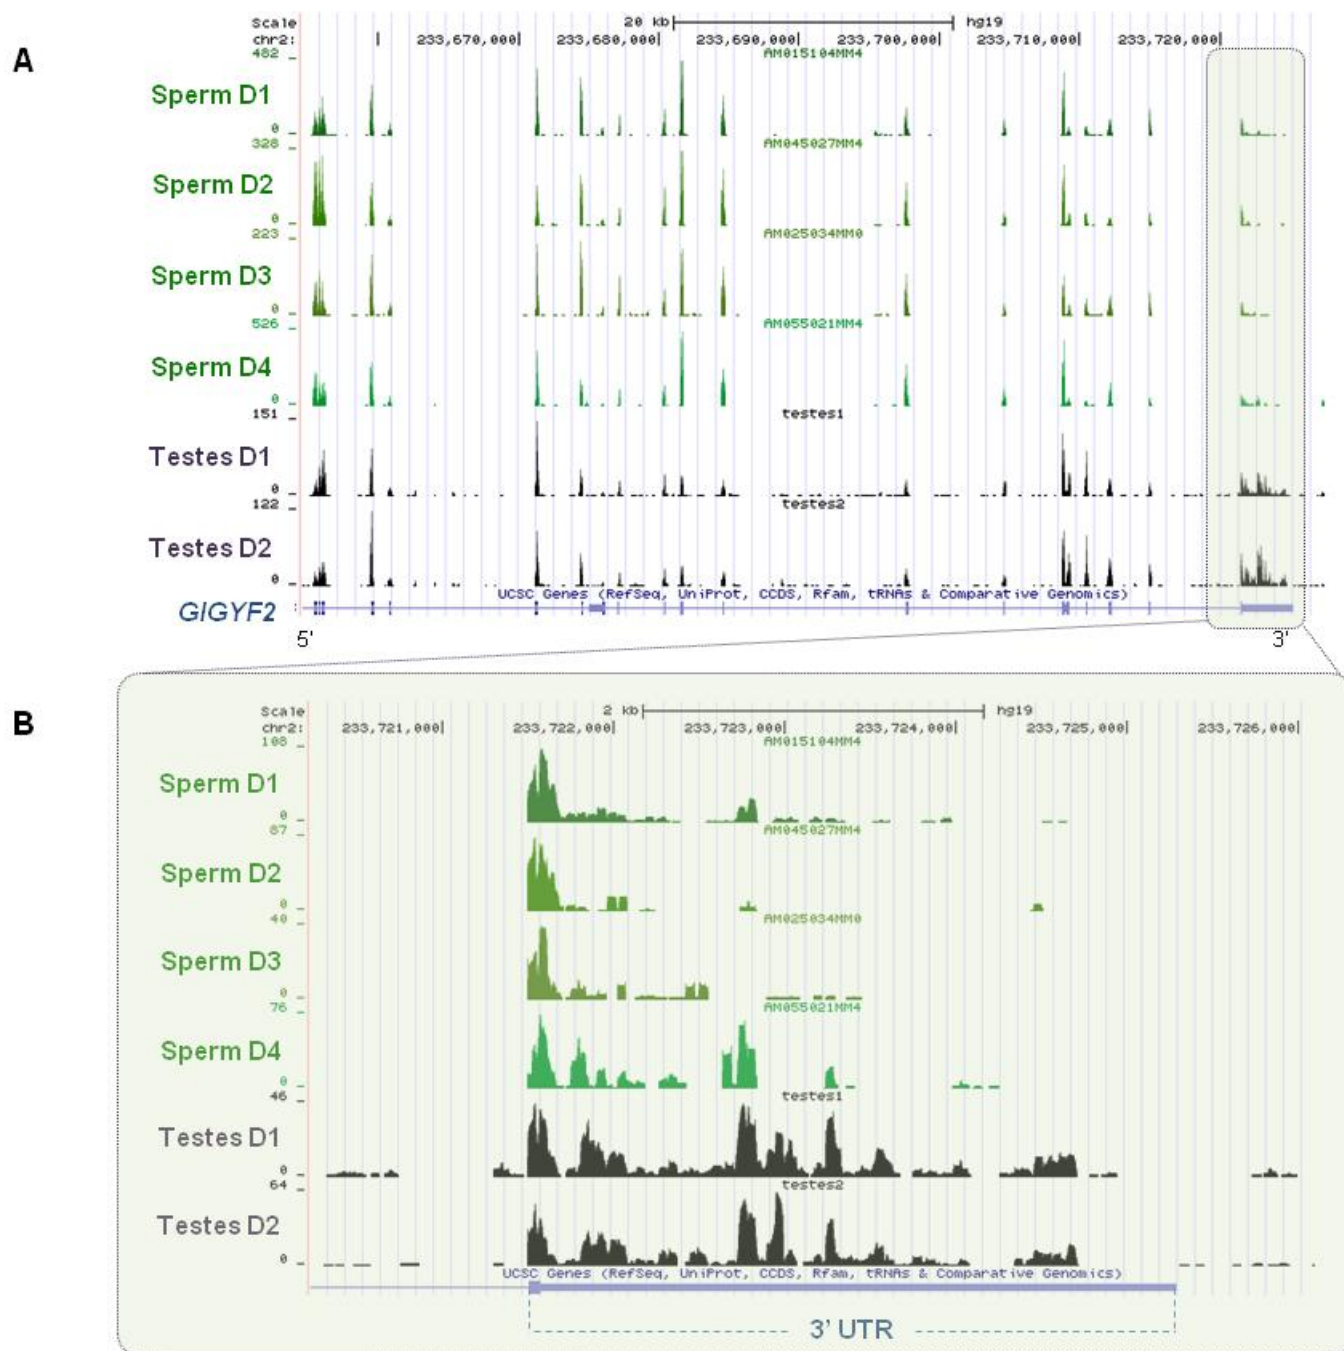

**Supplementary Figure 1:** Alternative polyadenylation of sperm transcripts. Corresponding to and expanding upon Figure 3 in main body of paper, transcript expression from four normal sperm samples and two testes samples is shown, revealing distinct expression of this sperm characteristic in all samples surveyed. (A) Example transcript *GIGYF2* in sperm and testes samples. B) Magnified view of 3'UTR region shows a truncated 3'UTR in sperm (green) in contrasts with coverage extending over the majority of the UTR observed in testes (black).

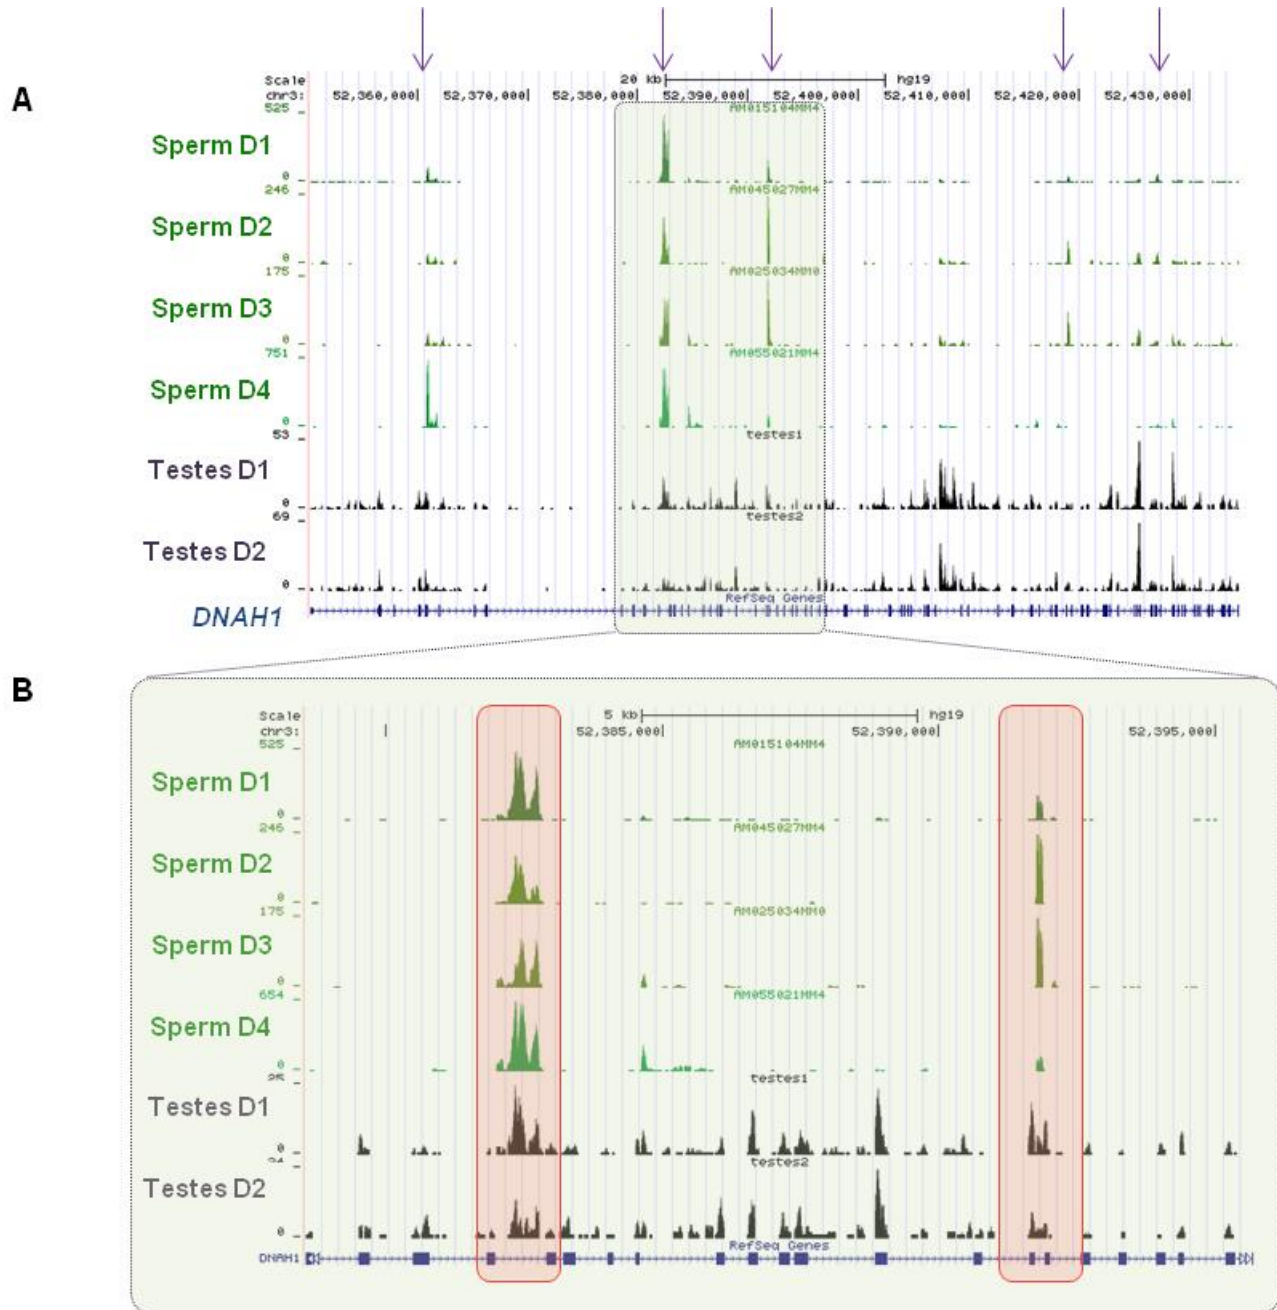

**Supplementary Figure 2:** Intronic Retained Elements in Sperm. Corresponding to and expanding upon Figure 5 in main body of paper, transcript expression from four normal sperm samples and two testes samples is shown, revealing distinct expression of this sperm characteristic in all samples surveyed. (A) Example transcript *DNAH1* shows five introns (purple arrows) in sperm samples showing significant expression, while the coding regions of this RNA are absent. In equivalently sequenced testes samples these intronic regions are underrepresented and resemble levels observed across the complete transcript (note y-axis). (B) Magnified view of two such introns showing that coverage in sperm is strictly restricted to the intronic sequences.

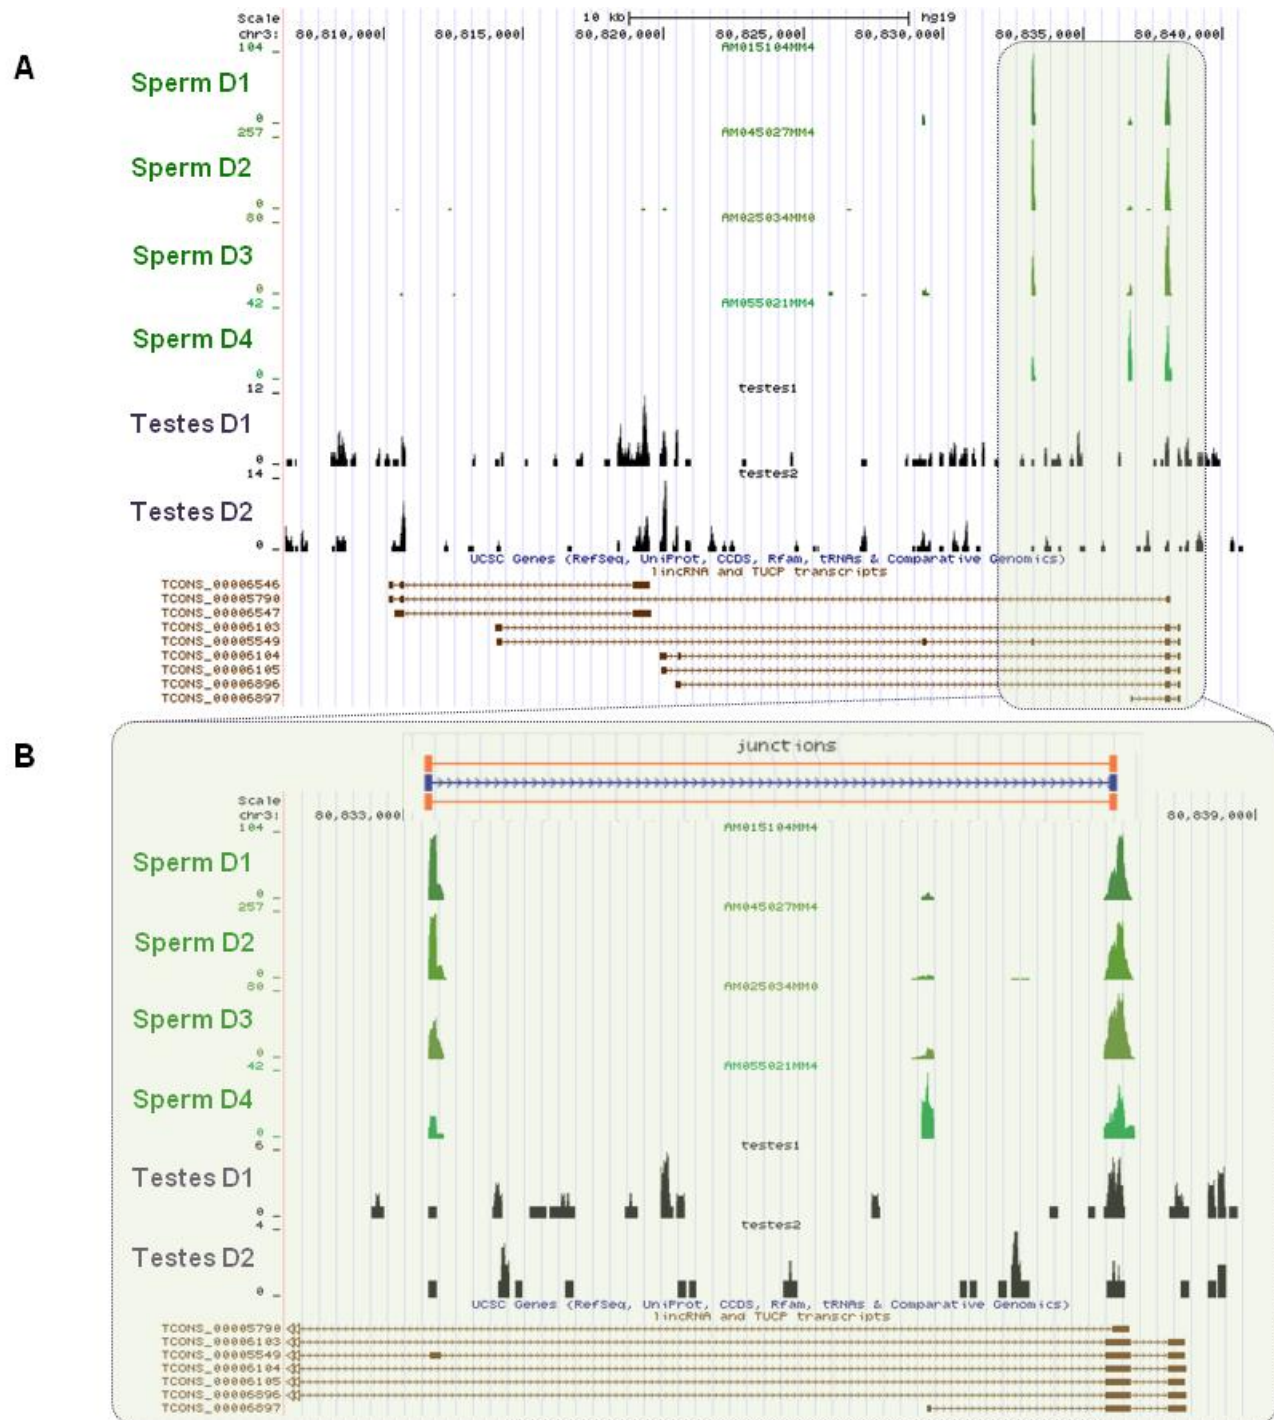

**Supplementary Figure 3: Unique sperm linc-RNAs isoforms.** Corresponding to and expanding upon Figure 6 in main body of paper, transcript expression from four normal sperm samples and two testes samples is shown, revealing distinct expression of this sperm characteristic in all samples surveyed. (A) Example of a 30 kb region of chromosome 3 containing a series of putative linc-RNAs. B) Magnified view of a part of this region shows the presence of two exons is part of a single spliced transcript in sperm samples, which was not previously identified.

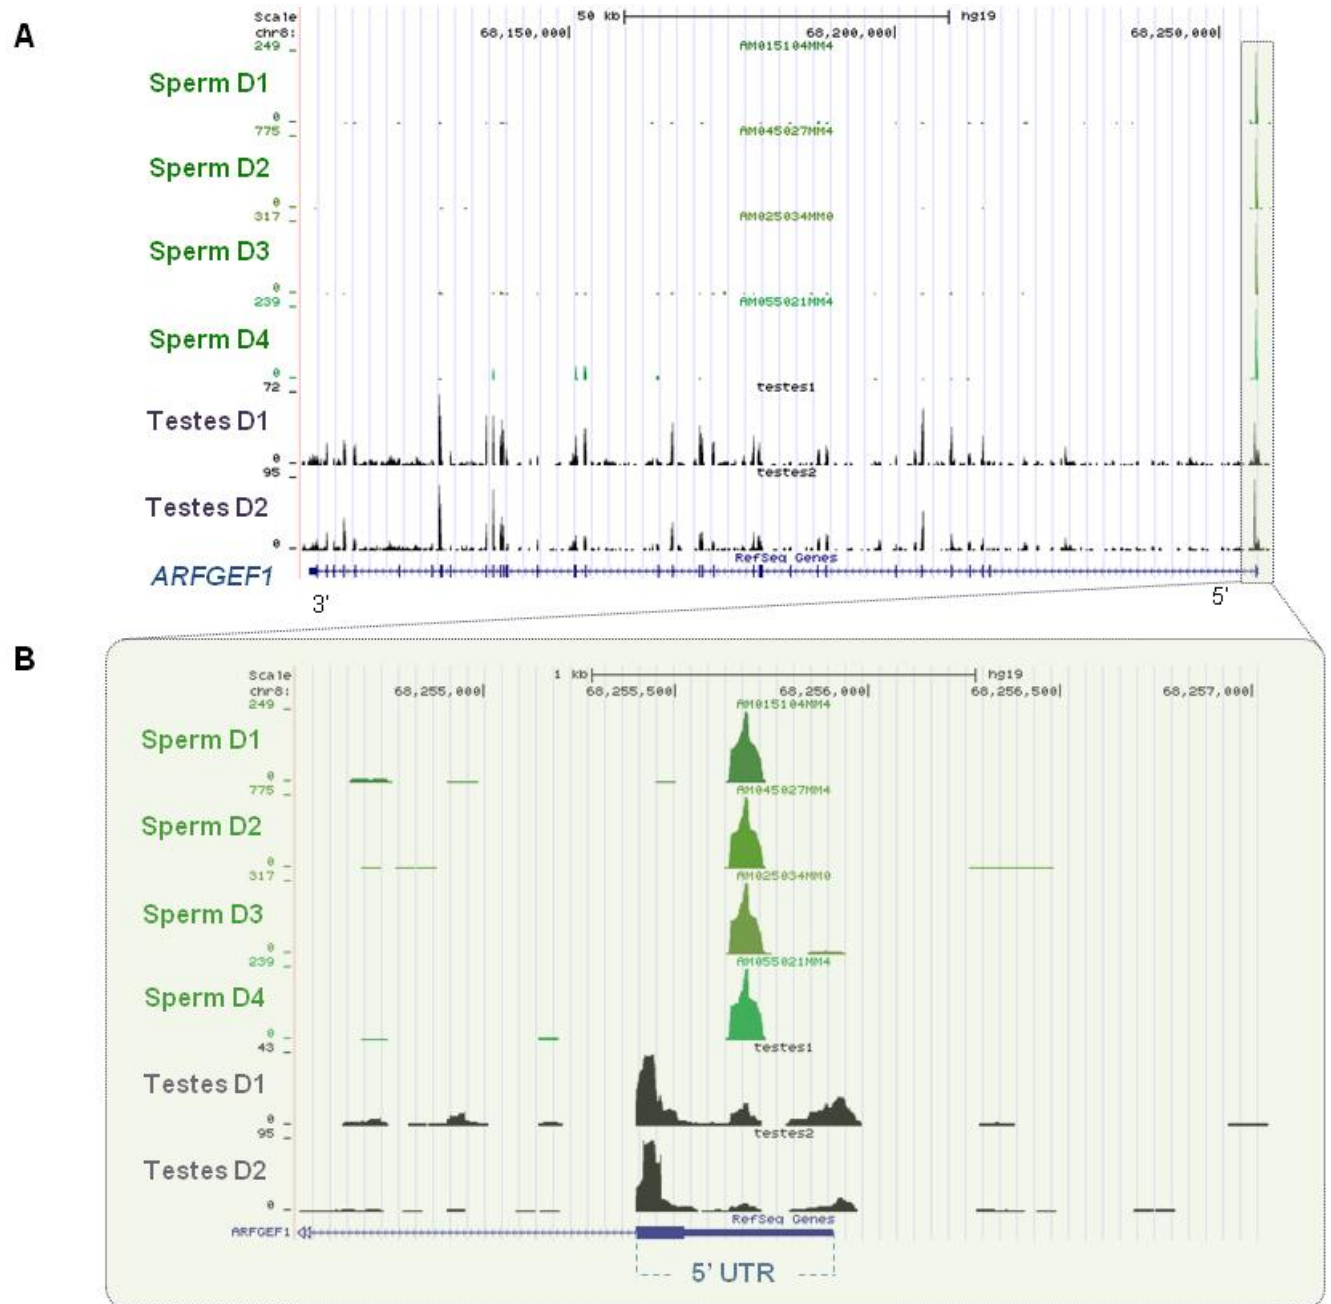

**Supplementary Figure 4: Exonic sperm elements.** Corresponding to and expanding upon Figure 7 in main body of paper, transcript expression from four normal sperm samples and two testes samples is shown, revealing distinct expression of this sperm characteristic in all samples surveyed. (A) Example transcript *ARFGEF1*. In testes, significant coverage of the complete transcript is observed. In contrast, sperm shows virtually no expression within the length of the coding transcript region. (B) Magnified view of 5'UTR region shows a sperm specific element virtually absent in equivalently prepared testes samples.

Supplementary Table 1: Transcripts identified between human and bovine spermatozoa

| Transcript<br>(Percentile<br>Ranking in<br>Human) | Transcript Name                                          | Reported function #                                                                                                        | References               |
|---------------------------------------------------|----------------------------------------------------------|----------------------------------------------------------------------------------------------------------------------------|--------------------------|
| SMCP<br>(0.99)                                    | Sperm mitochondria-associated cysteine-rich protein      | Sperm motility                                                                                                             | (Nayernia, et al., 2002) |
| GLUL<br>(0.99)                                    | Glutamate-ammonia ligase                                 | Functional role in sperm not reported                                                                                      |                          |
| GPX4<br>(0.99)                                    | Glutathione peroxidase 4 (phospholipid hydroperoxidase)  | Sperm motility and tail morphology.                                                                                        | (Imai, et al., 2009)     |
| DNAJB7<br>(0.99)                                  | Dnaj (Hsp40) homolog, subfamily B, member 7              | Functional role in sperm not reported<br>Probably acts as a co-chaperone,<br>Evidence at transcript level                  |                          |
| TPPP2<br>(0.99)                                   | Tubulin polymerization-promoting protein family member 2 | Essential for progression of germ cells past the pachytene stage of spermatogenesis<br>May regulate sperm motility         | (Zindy, et al., 2001)    |
| SPATA3<br>(0.99)                                  | Spermatogenesis associated 3                             | Functional role in sperm not reported                                                                                      |                          |
| GTSF1L<br>(0.99)                                  | Gametocyte specific factor 1-like                        | Functional role in sperm not reported                                                                                      |                          |
| TCEB2<br>(0.99)                                   | Transcription elongation factor B polypeptide 2          | Functional role in sperm not reported                                                                                      |                          |
| TAF10<br>(0.99)                                   | Transcription initiation factor TFIID subunit 10         | Functional role in sperm not reported<br>May play a role in sperm morphogenesis, cell cycle progression and embryogenesis. | (Mohan, et al., 2003)    |

|                    |                                                                                |                                                                                                      |                                                          |
|--------------------|--------------------------------------------------------------------------------|------------------------------------------------------------------------------------------------------|----------------------------------------------------------|
| CCDC91<br>(0.99)   | Coiled-coil domain containing protein 91                                       | Functional role in sperm not reported                                                                |                                                          |
| ZNF706<br>(0.99)   | Zinc finger protein 706                                                        | Functional role in sperm not reported                                                                |                                                          |
| CCDC54<br>(0.98)   | Coiled-coil domain-containing protein 54                                       | Functional role in sperm not reported                                                                |                                                          |
| PAFAH1B1<br>(0.98) | Platelet-activating factor acetylhydrolase IB subunit alpha                    | Role in spermiogenesis and sperm motility<br>Role in neuronal migration and early embryo development | (Hirotsume, et al., 1998, Nayernia, et al., 2003)        |
| FXR1<br>(0.98)     | Fragile X mental retardation syndrome-related protein 1<br>RNA-binding protein | Involved in movement/motility that are energy dependent.                                             | (Huot, et al., 2001)                                     |
| SPATA6<br>(0.98)   | Spermatogenesis-associated protein 6                                           | Functional role in sperm not reported<br>May play a role in spermatid maturation or sperm function   |                                                          |
| UBE2N<br>(0.98)    | Ubiquitin-conjugating enzyme E2 N                                              | Functional role in sperm not reported                                                                |                                                          |
| SRPK2<br>(0.98)    | SRSF protein kinase 2<br>Serine/arginine-rich protein-specific kinase          | Condensation of sperm chromatin                                                                      | (Kuroyanagi, et al., 1998, Papoutsopoulou, et al., 1999) |
| TSPAN6<br>(0.98)   | Tetraspanin-6                                                                  | Functional role in sperm not reported                                                                |                                                          |
| CAPZB<br>(0.98)    | CAPZB protein<br>F-actin capping protein subunit beta 2                        | Proposed to have a role on capacitation and acrosome reaction                                        | (Chen, et al., 2012)                                     |



|                    |                                                                |                                                                                                                                                                             |                                             |
|--------------------|----------------------------------------------------------------|-----------------------------------------------------------------------------------------------------------------------------------------------------------------------------|---------------------------------------------|
| DDX4<br>(0.98)     | Probable ATP-dependent RNA helicase DDX4<br>DEAD Box Protein 4 | Germ cell development.<br>sperm motility                                                                                                                                    | (Li, et al., 2010)                          |
| MLF1<br>(0.97)     | Myeloid leukemia factor 1                                      | Functional role in sperm not reported                                                                                                                                       |                                             |
| C15orf23<br>(0.97) | Small kinetochore-associated protein                           | Functional role in sperm not reported<br>Involved in mitosis, cell division from metaphase to anaphase                                                                      | (Fang, et al., 2009)                        |
| C6orf225<br>(0.97) | Putative uncharacterized protein                               | Functional role in sperm not reported                                                                                                                                       |                                             |
| FILIP1L<br>(0.97)  | Filamin-A-interacting protein 1                                | Functional role in sperm not reported                                                                                                                                       |                                             |
| HEMGN<br>(0.97)    | Hemogen                                                        | Functional role in sperm not reported<br>Expressed in round spermatids<br>Testis-specific isoform of <i>HEMGN</i> proposed to have a role in spermatogenesis, first meiosis | (Yang, et al., 2003)<br>(Liu, et al., 2013) |
| TMBIM6<br>(0.97)   | Bax inhibitor 1<br>Testis-enhanced gene transcript protein     | Functional role in sperm not reported<br>Suppressor of apoptosis<br>Highly abundant in testis.                                                                              | (Walter, et al., 1995)                      |
| C12orf54<br>(0.97) | Uncharacterized protein<br>C12orf54<br>(HSD 29)                | Functional role in sperm not reported<br>May regulate hormone activity?                                                                                                     | (Oppermann and Maser, 1996)                 |
| GKAP1<br>(0.96)    | G kinase-anchoring protein 1                                   | Functional role in sperm not reported<br>May have a role through the interaction with Golgi-associated proteins during spermatogenesis.                                     | (Yuasa, et al., 2000)                       |
| CHMP5<br>(0.96)    | Charged multivesicular body protein 5                          | Functional role in sperm not reported                                                                                                                                       |                                             |

|                   |                                                                                                    |                                                                                                                                                                                                 |                                                 |
|-------------------|----------------------------------------------------------------------------------------------------|-------------------------------------------------------------------------------------------------------------------------------------------------------------------------------------------------|-------------------------------------------------|
| ARL4A<br>(0.96)   | ADP-ribosylation factor-like protein 4A                                                            | Spermatid maturation and sperm production                                                                                                                                                       | (Jacobs, et al., 1998, Schurmann, et al., 2002) |
| SPATA19<br>(0.95) | Spermatogenesis-associated protein 19, mitochondrial<br>Spermatogenic cell-specific gene 1 protein | Functional role in sperm not reported<br>Act as a binding molecule between adjacent mitochondria in the sheath                                                                                  | (Doiguchi, et al., 2002)                        |
| GSTM3<br>(0.95)   | Glutathione S-transferase Mu 3                                                                     | Functional role in sperm not reported<br>Sperm fibrous sheath function                                                                                                                          | (Fulcher, et al., 1995)                         |
| POLR21<br>(0.95)  | DNA-directed RNA polymerase 21 kDa subunit                                                         | Functional role in sperm not reported                                                                                                                                                           |                                                 |
| TNP1<br>(0.99)    | Spermatid nuclear transition protein 1 *                                                           | Chromatin condensation                                                                                                                                                                          | (Yu, et al., 2000)                              |
| HMGB4<br>(0.99)   | High mobility group protein B4 *                                                                   | Chromatin-associated protein, present in the euchromatin of late pachytene spermatocytes and haploid round spermatids. Stronger expression is observed during the elongation phase of spermatid | (Catena, et al., 2009)                          |
| TMCO2<br>(0.99)   | Transmembrane and coiled-coil domain-containing protein 2 *                                        | Functional role in sperm not reported                                                                                                                                                           |                                                 |
| H3F3C<br>(0.99)   | Histone H3.3C *                                                                                    | Sperm nucleosome assembly                                                                                                                                                                       | (Henikoff, et al., 2004, Loppin, et al., 2005)  |
| UBB<br>(0.99)     | Polyubiquitin-B *                                                                                  | Functional role in sperm not reported<br>May be important for acrosomal reaction during fertilization process.                                                                                  | (Hou and Yang, 2012)                            |
| DCUN1D1<br>(0.99) | DCN1-like protein 1 *                                                                              | Functional role in sperm not reported                                                                                                                                                           |                                                 |



|                   |                                                                            |                                                                                                                                                                                                      |                                                          |
|-------------------|----------------------------------------------------------------------------|------------------------------------------------------------------------------------------------------------------------------------------------------------------------------------------------------|----------------------------------------------------------|
| CA2<br>(0.99)     | Carbonic anhydrase 2 *                                                     | Associated with motility<br>The CA2 protein is expressed in the spermatogenic stage of elongating spermatids and localized in the sperm tail.<br>The expression of CA2 is high asthenozoospermic men | (Zhao, et al., 2010)                                     |
| UQCRB<br>(0.98)   | Cytochrome b-c1 complex subunit 7 *                                        | Functional role in sperm not reported<br>Mitochondrial respiration                                                                                                                                   |                                                          |
| CAPZA3<br>(0.97)  | F-actin-capping protein subunit alpha-3/<br>Germ cell-specific protein 3 * | Functional role in sperm not reported<br>Capacitation reaction                                                                                                                                       | (Sosnik, et al., 2010)                                   |
| SERF2<br>(0.97)   | Small EDRK-rich factor 2 *                                                 | Functional role in sperm not reported                                                                                                                                                                |                                                          |
| GABARAP<br>(0.96) | GABA(A) receptor-associated protein *                                      | Functional role in sperm not reported                                                                                                                                                                |                                                          |
| RPL35<br>(0.96)   | 60S ribosomal protein L35*                                                 | Functional role in sperm not reported                                                                                                                                                                |                                                          |
| DNAJB3<br>(0.95)  | DNAJ homolog subfamily B member 3*                                         | Acrosomal reaction and sperm-oocyte interaction                                                                                                                                                      | (Berruti and Martegani, 2005, Meccariello, et al., 2008) |

The transcripts were selected and compared based on the RNA seq data from human (Sendler et al., 2013) and bovine (Card, et al., 2013). The top 5% of the transcripts of the RNA seq data from human were compared with bovine (FPKM>100).

Orthologous genes were identified with Genomatix RegionMiner: Search for orthologous GeneIDs module

Only stallion, bovine were compared for abundance, as these are the only species for which equivalent RNA-seq data is available

\* represents genes which do not show required level of similarity to be classified as orthologous by this module, but which nevertheless share similar name to human transcript

# The functions were checked in [www.pubmed.com](http://www.pubmed.com), [www.iHop-net.com](http://www.iHop-net.com) and [www.uniprot.org](http://www.uniprot.org)

#### References:

- Berruti G and Martegani E. The deubiquitinating enzyme mUBPy interacts with the sperm-specific molecular chaperone MSJ-1: The relation with the proteasome, acrosome, and centrosome in mouse male germ cells. *Biology of reproduction* 2005; **72**:14-21.
- Catena R, Escoffier E, Caron C, Khochbin S, Martianov I and Davidson I. HMGB4, a Novel Member of the HMGB Family, Is Preferentially Expressed in the Mouse Testis and Localizes to the Basal Pole of Elongating Spermatids. *Biology of reproduction* 2009; **80**:358-366.
- Chen XL, Zhu HB, Wu CJ, Han WD, Hao HS, Zhao XM, Du WH, Qin T, Liu Y and Wang D. Identification of differentially expressed proteins between bull X and Y spermatozoa. *J Proteomics* 2012; **77**:59-67.
- Doiguchi M, Mori T, Toshimori K, Shibata Y and Iida H. Spergen-1 might be an adhesive molecule associated with mitochondria in the middle piece of spermatozoa. *Developmental biology* 2002; **252**:127-137.
- Fang L, Seki A and Fang G. SKAP associates with kinetochores and promotes the metaphase-to-anaphase transition. *Cell Cycle* 2009; **8**:2819-2827.
- Fulcher KD, Welch JE, Klapper DG, O'Brien DA and Eddy EM. Identification of a unique mu-class glutathione S-transferase in mouse spermatogenic cells. *Mol Reprod Dev* 1995; **42**:415-424.
- Henikoff S, Furuyama T and Ahmad K. Histone variants, nucleosome assembly and epigenetic inheritance. *Trends in genetics : TIG* 2004; **20**:320-326.
- Hirotsune S, Fleck MW, Gambello MJ, Bix GJ, Chen A, Clark GD, Ledbetter DH, McBain CJ and Wynshaw-Boris A. Graded reduction of Pafah1b1 (Lis1) activity results in neuronal migration defects and early embryonic lethality. *Nature genetics* 1998; **19**:333-339.
- Hou CC and Yang WX. New insights to the ubiquitin-proteasome pathway (UPP) mechanism during spermatogenesis. *Molecular biology reports* 2012.
- Huot ME, Mazroui R, Leclerc P and Khandjian EW. Developmental expression of the fragile X-related 1 proteins in mouse testis: association with microtubule elements. *Hum Mol Genet* 2001; **10**:2803-2811.
- Imai H, Hakkaku N, Iwamoto R, Suzuki J, Suzuki T, Tajima Y, Konishi K, Minami S, Ichinose S, Ishizaka K et al. Depletion of selenoprotein GPx4 in spermatocytes causes male infertility in mice. *The Journal of biological chemistry* 2009; **284**:32522-32532.
- Jacobs S, Schurmann A, Becker W, Bockers TM, Copeland NG, Jenkins NA and Joost HG. The mouse ADP-ribosylation factor-like 4 gene: two separate promoters direct specific transcription in tissues and testicular germ cell. *Biochem J* 1998; **335 ( Pt 2)**:259-265.

Kuroyanagi N, Onogi H, Wakabayashi T and Hagiwara M. Novel SR-protein-specific kinase, SRPK2, disassembles nuclear speckles. *Biochemical and biophysical research communications* 1998; **242**:357-364.

Li HJ, Yu N, Zhang XY, Jin W and Li HZ. Spermatozoal protein profiles in male infertility with asthenozoospermia. *Chinese Med J-Peking* 2010; **123**:2879-2882.

Liu M, Hu Z, Qi L, Wang J, Zhou T, Guo Y, Zeng Y, Zheng B, Wu Y, Zhang P et al. Scanning of novel cancer/testis proteins by human testis proteomic analysis. *Proteomics* 2013.

Loppin B, Bonnefoy E, Anselme C, Laurencon A, Karr TL and Couble P. The histone H3.3 chaperone HIRA is essential for chromatin assembly in the male pronucleus. *Nature* 2005; **437**:1386-1390.

Meccariello R, Berruti G, Chianese R, De Santis R, Di Cunto F, Scarpa D, Cobellis G, Zucchetti I, Pierantoni R, Altruda F et al. Structure of msj-1 gene in mice and humans: a possible role in the regulation of male reproduction. *General and comparative endocrinology* 2008; **156**:91-103.

Mohan WS, Scheer E, Wendling O, Metzger D and Tora L. TAF10 (TAF(II)30) is necessary for TFIID stability and early embryogenesis in mice. *Mol Cell Biol* 2003; **23**:4307-4318.

Nayernia K, Adham IM, Burkhardt-Gottges E, Neesen J, Rieche M, Wolf S, Sancken U, Kleene K and Engel W. Asthenozoospermia in mice with targeted deletion of the sperm mitochondrion-associated cysteine-rich protein (Smcp) gene. *Mol Cell Biol* 2002; **22**:3046-3052.

Nayernia K, Vauti F, Meinhardt A, Cadenas C, Schweyer S, Meyer BI, Schwandt I, Chowdhury K, Engel W and Arnold HH. Inactivation of a testis-specific Lis1 transcript in mice prevents spermatid differentiation and causes male infertility. *The Journal of biological chemistry* 2003; **278**:48377-48385.

Oppermann UCT and Maser E. Characterization of a 3 alpha-hydroxysteroid dehydrogenase carbonyl reductase from the gram-negative bacterium *Comamonas testosteroni*. *European Journal of Biochemistry* 1996; **241**:744-749.

Papoutsopoulou S, Nikolakaki E, Chalepakis G, Kruff V, Chevaillier P and Giannakouros T. SR protein-specific kinase 1 is highly expressed in testis and phosphorylates protamine 1. *Nucleic acids research* 1999; **27**:2972-2980.

Schurmann A, Koling S, Jacobs S, Saftig P, Krauss S, Wennemuth G, Kluge R and Joost HG. Reduced sperm count and normal fertility in male mice with targeted disruption of the ADP-ribosylation factor-like 4 (Arl4) gene. *Mol Cell Biol* 2002; **22**:2761-2768.

Sosnik J, Buffone MG and Visconti PE. Analysis of CAPZA3 Localization Reveals Temporally Discrete Events During the Acrosome Reaction. *J Cell Physiol* 2010; **224**:575-580.

Walter L, Marynen P, Szpirer J, Levan G and Gunther E. Identification of a novel conserved human gene, TEGT. *Genomics* 1995; **28**:301-304.

Yang LV, Heng HH, Wan JM, Southwood CM, Gow A and Li L. Alternative promoters and polyadenylation regulate tissue-specific expression of hemogen isoforms during hematopoiesis and spermatogenesis. *Dev Dynam* 2003; **228**:606-616.

Yu YE, Zhang Y, Unni E, Shirley CR, Deng JM, Russell LD, Weil MM, Behringer RR and Meistrich ML. Abnormal spermatogenesis and reduced fertility in transition nuclear protein 1-deficient mice. *Proceedings of the National Academy of Sciences of the United States of America* 2000; **97**:4683-4688.

Yuasa K, Omori K and Yanaka N. Binding and phosphorylation of a novel male germ cell-specific cGMP-dependent protein kinase-anchoring protein by cGMP-dependent protein kinase Ialpha. *The Journal of biological chemistry* 2000; **275**:4897-4905.

Zhao C, Zhou ZM, Sha JH and Pan SY. [Expression of carbonic anhydrase II in human testes and spermatozoa and its clinical significance]. *Zhonghua nan ke xue = National journal of andrology* 2010; **16**:911-914.

Zindy F, den Besten W, Chen B, Rehg JE, Latres E, Barbacid M, Pollard JW, Sherr CJ, Cohen PE and Roussel MF. Control of spermatogenesis in mice by the cyclin D-dependent kinase inhibitors p18(Ink4c) and p19(Ink4d). *Molecular and cellular biology* 2001; **21**:3244-3255.

Supplementary Table 2: Transcripts identified between human and stallion spermatozoa

| Transcript<br>(Percentile<br>Ranking in<br>Human) | Transcript Name                                                     | Reported function #                                                                                                                                          | References                    |
|---------------------------------------------------|---------------------------------------------------------------------|--------------------------------------------------------------------------------------------------------------------------------------------------------------|-------------------------------|
| HNRNPH1<br>(0.99)                                 | Heterogeneous nuclear<br>ribonucleoprotein H                        | Functional role in sperm not reported<br>It is an anti-apoptosis protein, expressed in the nucleus of<br>spermatocytes.                                      | (Zhu, et al., 2011)           |
| HDAC11<br>(0.99)                                  | Histone deacetylase 11                                              | Functional role in sperm not reported<br>Highly conserved from C.elegans to man.                                                                             | (Doiguchi, et al., 2002)      |
| ODF2<br>(0.99)                                    | Outer dense fiber protein<br>2 (ODF of sperm tails<br>protein 2)    | Sperm motility                                                                                                                                               | (Tarnasky, et al.,<br>2010)   |
| ACE<br>(0.99)                                     | Angiotensin-converting<br>enzyme 2                                  | Sperm transport in oviduct                                                                                                                                   | (Chen, et al., 2012)          |
| REEP6<br>(0.99)                                   | Receptor expression-<br>enhancing protein                           | Localized to the posterior head, may involve in sperm-egg fusion                                                                                             | (ZHANG Mian-qiu,<br>2011)     |
| AKAP1<br>(0.99)                                   | A kinase-anchoring<br>proteins                                      | pKa signalling in spermatozoa, various functions including motility                                                                                          | (Lin, et al., 1995)           |
| PICK1<br>(0.99)                                   | Protein interacting with C<br>kinase 1                              | Sperm morphogenesis, acrosome formation and sperm motility                                                                                                   | (Xiao, et al., 2009)          |
| UBXN6<br>(0.99)                                   | UBX domain-containing<br>protein 6                                  | Functional role in sperm not reported<br>May enhance the expression of genes involved in apoptosis, cell cycling<br>or targeting of proteins for degradation | (Carim-Todd, et al.,<br>2001) |
| HGS<br>(0.99)                                     | Hepatocyte growth factor-<br>regulated tyrosine kinase<br>substrate | Functional role in sperm not reported<br>Involved in intracellular signal transduction mediated by cytokines and<br>growth factors                           | (Itman, et al., 2011)         |
| CLK3<br>(0.99)                                    | Dual specificity protein<br>kinase CLK3                             | Functional role in sperm not reported<br>Proposed to regulate capacitation and acrosomal reaction                                                            | (Menegay, et al.,<br>1999)    |
| CALCOCO2<br>(0.99)                                | Calcium-binding and<br>coiled-coil domain-                          | Functional role in sperm not reported                                                                                                                        |                               |

|                  |                                                                                           |                                                                                                                                                                                                                        |                             |
|------------------|-------------------------------------------------------------------------------------------|------------------------------------------------------------------------------------------------------------------------------------------------------------------------------------------------------------------------|-----------------------------|
|                  | containing protein 2                                                                      |                                                                                                                                                                                                                        |                             |
| LPIN1<br>(0.99)  | Phosphatidate phosphatase LPIN1                                                           | Functional role in sperm not reported                                                                                                                                                                                  |                             |
| TCP11<br>(0.99)  | T-complex protein 1 subunit alpha                                                         | Sperm capacitation and promote fertilizing ability                                                                                                                                                                     | (Fraser, et al., 1997)      |
| OAZ3<br>(0.99)   | Ornithine decarboxylase antizyme 3                                                        | Involved in spermiogenesis male mice are infertile due to the separation of sperm heads and tails,                                                                                                                     | (Tokuhiro, et al., 2009)    |
| CARM1<br>(0.99)  | Coactivator-associated arginine methyl-transferase 1 (Histone-arginine methyltransferase) | Functional role in sperm not reported<br>Plays Complex role in controlling gene expression, regulating transcription, DNA packaging, mRNA stability and translation.<br>Mainly involved in estrogen dependent actions? | (Yadav, et al., 2003)       |
| ERGIC3<br>(0.99) | Endoplasmic reticulum-Golgi intermediate compartment protein 3                            | Functional role in sperm not reported<br>Possible role in transport between endoplasmic reticulum and Golgi                                                                                                            |                             |
| NSUN4<br>(0.99)  | 5-methylcytosine rRNA methyltransferase NSUN4                                             | Functional role in sperm not reported<br>Involved in mitochondrial ribosome large subunit biogenesis.                                                                                                                  |                             |
| FUS<br>(0.99)    | RNA-binding protein FUS                                                                   | Functional role in sperm not reported<br>Spermatogenic RNA-binding proteins<br>Involved in meiotic stage of spermatogenesis                                                                                            | (Kuroda, et al., 2000)      |
| IQCE<br>(0.99)   | IQ domain-containing protein E                                                            | Functional role in sperm not reported                                                                                                                                                                                  |                             |
| HABP4<br>(0.99)  | Intracellular hyaluronan-binding protein 4                                                | Functional role in sperm not reported<br>Hyaluronan binding proteins are involved in sperm maturation, motility                                                                                                        | (Ranganathan, et al., 1994) |
| GPI<br>(0.99)    | Glucose-6-phosphate isomerase SA-36 (Sperm antigen 36)                                    | Sperm agglutination                                                                                                                                                                                                    | (Ronfani, et al., 2001)     |
| RERE<br>(0.99)   | Arginine-glutamic acid dipeptide repeats protein                                          | Functional role in sperm not reported                                                                                                                                                                                  |                             |

|                      |                                                              |                                                                                                                                                                                                                                                                                                                 |                                                                      |
|----------------------|--------------------------------------------------------------|-----------------------------------------------------------------------------------------------------------------------------------------------------------------------------------------------------------------------------------------------------------------------------------------------------------------|----------------------------------------------------------------------|
|                      |                                                              |                                                                                                                                                                                                                                                                                                                 |                                                                      |
| DDX5<br>(0.99)       | Probable ATP-dependent RNA helicase DDX5/ DEAD box protein 5 | Functional role in sperm not reported<br>May regulate late pachytene spermatocytes and haploid spermatids development.<br>Play an important roles in diverse biological processes such as development, regulation of transcription, RNA processing, and ribosome biogenesis, miRNA pathway and signaling events | (Arun, et al., 2012)<br>Reviewed in (Cordin, et al., 2006)           |
| GAPDHS<br>(0.99)     | glyceraldehyde-3-phosphate dehydrogenase-S                   | Sperm Motility<br>May play an important role in regulating the switch between different pathways for energy production during spermiogenesis and in the spermatozoon. Required for sperm motility and male fertility                                                                                            | (Li and Zhang, 2013, Miki, et al., 2004)                             |
| VPRBP<br>(0.99)      | Protein VPRBP                                                | Functional role in sperm not reported<br>Involved in spermiogenesis                                                                                                                                                                                                                                             | (Nagamori, et al., 2005)                                             |
| PDE4A<br>(0.99)      | cAMP-specific 3',5'-cyclic phosphor-diesterase 4A            | cAMP specific involved in regulating sperm motility (PDE4 inhibitors enhanced sperm Motility)                                                                                                                                                                                                                   | (Conti, et al., 1995, Fisch, et al., 1999)                           |
| CIB1<br>(0.99)       | Calcium and integrin-binding protein 1                       | Functional role in sperm not reported<br>Regulate cell cycle and spermatogenesis                                                                                                                                                                                                                                | (Yuan, et al., 2006)                                                 |
| NRD1<br>(0.98)       | Nardilysin                                                   | Functional role in sperm not reported<br>Associated with the morphological transformations during final steps of spermiogenesis.                                                                                                                                                                                | (Chesneau, et al., 1996)                                             |
| CALR3<br>(0.98)      | Calreticulin-3                                               | Functional role in sperm not reported<br>This gene is specifically expressed in elongated spermatid<br>May regulate sperm transport in the female reproductive tract and sperm-zona binding                                                                                                                     | (Hayashi, et al., 2007, Ikawa, et al., 1997, Yamagata, et al., 2002) |
| C17orf105<br>(0.98 ) |                                                              | Functional role in sperm not reported                                                                                                                                                                                                                                                                           |                                                                      |
| NBR1<br>(0.98)       | Next to BRCA1 gene 1 protein                                 | Functional role in sperm not reported<br>Probably involved in spermiogenesis<br>Receptor for selective autophagosomal degradation of ubiquitinated targets                                                                                                                                                      | (Dimitrov, et al., 2001)                                             |
| FGFR1OP              | FGFR1 oncogene partner                                       | Functional role in sperm not reported                                                                                                                                                                                                                                                                           |                                                                      |



|                  |                                                               |                                                                                                                                                                                |                                  |
|------------------|---------------------------------------------------------------|--------------------------------------------------------------------------------------------------------------------------------------------------------------------------------|----------------------------------|
| (0.98)           |                                                               | Required for anchoring microtubules to the centrosomes                                                                                                                         |                                  |
| PPP6R1<br>(0.98) | Serine/threonine-protein phosphatase 6 regulatory subunit 1   | Functional role in sperm not reported<br>Ubiquitous with higher expression in testis                                                                                           | (Stefansson and Brautigan, 2006) |
| NDEL1<br>(0.98)  | Nuclear distribution protein nudE-like 1                      | Functional role in sperm not reported<br>NUDEL plays an important role in germ cell formation, including nucleoplasmic transport and nucleus shaping by manchette microtubules | (Yamaguchi, et al., 2004)        |
| CLIP3<br>(0.98)  | CAP-Gly domain-containing linker protein 3                    | Functional role in sperm not reported<br>Higher affinity to bind to Akt2 and may regulate glucose transport                                                                    | (Couesnon, et al., 2013)         |
| CHD5<br>(0.98)   | Chromodomain-helicase-DNA-binding protein 5                   | Functional role in sperm not reported                                                                                                                                          |                                  |
| DNAJA4<br>(0.98) | DnaJ (Hsp40) homolog, subfamily A, member 4                   | Functional role in sperm not reported<br>Expression is abundant in testis and elongated spermatids                                                                             | (Hafizur, et al., 2004)          |
| REXO1<br>(0.98)  | REXO1                                                         | Associated to sperm concentration and sperm morphology, and mild testicular atrophy.                                                                                           | (Rezende, et al., 2011)          |
| MORC2<br>(0.98 ) | MORC family CW-type zinc finger protein 2                     | Functional role in sperm not reported<br>Regulate chromatin remodeling                                                                                                         | (Li, et al., 2012)               |
| TRA2A<br>(0.98)  | Transformer-2 protein homolog alpha                           | Functional role in sperm not reported<br>Sequence-specific RNA-binding protein which participates in the control of pre-mRNA splicing                                          |                                  |
| PDXDC1<br>(0.97) | Pyridoxal-dependent decarboxylase domain-containing protein 1 | Functional role in sperm not reported                                                                                                                                          |                                  |
| GGNBP2<br>(0.97) | Gametogenetin-binding protein 2                               | Functional role in sperm not reported<br>Germ cell development. Suggested to have a role in spermatocytogenesis and spermiogenesis                                             | (Zhang, et al., 2005)            |
| RNF168           | E3 ubiquitin-protein ligase                                   | Functional role in sperm not reported                                                                                                                                          | (Bohgaki, et al., 2011)          |

|                    |                                                                                |                                                                                                                                                                                                            |                                              |
|--------------------|--------------------------------------------------------------------------------|------------------------------------------------------------------------------------------------------------------------------------------------------------------------------------------------------------|----------------------------------------------|
| (0.97)             | RNF168                                                                         | Suggested function in Spermatogenesis                                                                                                                                                                      |                                              |
| ARHGAP33<br>(0.97) | Rho GTPase-activating protein 33                                               | Functional role in sperm not reported                                                                                                                                                                      |                                              |
| RBBP6<br>(0.97)    | E3 ubiquitin-protein ligase RBBP6<br>p53-associated cellular protein of testis | Functional role in sperm not reported<br>Highly expressed in the placenta and testis<br>Ubl conjugation pathway                                                                                            |                                              |
| KIF17<br>(0.97)    | Kinesin-like protein KIF17                                                     | Functional role in sperm not reported<br>Microtubule-dependent mobility of chromatoid bodies, as well as for the transport of the specific components in and out of the chromatoid body<br>Spermatogenesis | (Kotaja, et al., 2006, Kotaja, et al., 2005) |
| ZRANB1<br>(0.97 )  | Ubiquitin thioesterase ZRANB1                                                  | Functional role in sperm not reported                                                                                                                                                                      |                                              |
| ACIN1<br>(0.97 )   |                                                                                | Functional role in sperm not reported                                                                                                                                                                      |                                              |
| CKAP5<br>(0.97 )   | CKAP5 protein                                                                  | Functional role in sperm not reported                                                                                                                                                                      |                                              |
| CEP152<br>(0.97)   | Centrosomal protein of 152 kDa                                                 | Functional role in sperm not reported<br>Centrosomal protein; maintaining genomic stability through regulation of the DNA damage response                                                                  |                                              |
| LRRC27<br>(0.97)   | Leucine-rich repeat-containing protein 27                                      | Functional role in sperm not reported                                                                                                                                                                      |                                              |
| HIP1<br>(0.97)     | Huntingtin-interacting protein 1                                               | Stabilizing actin and microtubules, which are important cytoskeletal elements enabling normal spermatid and Sertoli cell morphology and function.<br>Regulates sperm motility?                             | (Khatchadourian, et al., 2007)               |
| SPATA24            | Spermatogenesis-                                                               | Functional role in sperm not reported                                                                                                                                                                      |                                              |

|                    |                                               |                                                                                                                                                                                                                                             |                                                         |
|--------------------|-----------------------------------------------|---------------------------------------------------------------------------------------------------------------------------------------------------------------------------------------------------------------------------------------------|---------------------------------------------------------|
| (0.97)             | associated protein 24                         | Cytoplasm movement and removal during spermiogenesis??                                                                                                                                                                                      |                                                         |
| IPO5<br>(0.96)     | IPO5 protein                                  | Functional role in sperm not reported<br>Functions related to germ cell development<br>Transport factors between the nucleus and cytoplasm at specific stages of spermatogenesis                                                            | (Loveland, et al., 2006)                                |
| INTS1<br>(0.96)    | Integrator complex subunit 1                  | Functional role in sperm not reported<br>Involved in the small nuclear RNAs (snRNA) U1 and U2 transcription and processing. May have a role in spermiogenesis<br>Essential for development of central nervous system in early stage embryos | (Shackleford and Varmus, 1987)<br>(Ariel, et al., 1991) |
| SLC25A39<br>(0.96) | Solute carrier family 25 member 39            | Functional role in sperm not reported<br>Abundantly expressed in testis.                                                                                                                                                                    |                                                         |
| CAMKV<br>(0.96)    | CaM kinase-like vesicle-associated protein    | Functional role in sperm not reported                                                                                                                                                                                                       |                                                         |
| RAB3IL1<br>(0.96)  | Guanine nucleotide exchange factor for Rab-3A | Functional role in sperm not reported<br>Guanine nucleotide exchange factor (GEF) which may activate RAB3A, a GTPase that regulates synaptic vesicle exocytosis. Promotes the exchange of GDP to GTP                                        |                                                         |
| VAV2<br>(0.95)     | Guanine nucleotide exchange factor VAV2       | Functional role in sperm not reported<br>Plays an important role in angiogenesis. Its recruitment by phosphorylated EPHA2 is critical for EFNA1-induced RAC1 GTPase activation and vascular endothelial cell migration and assembly         |                                                         |
| RFX3<br>(0.95)     | Transcription factor RFX3                     | Functional role in sperm not reported<br>Required for the biogenesis of motile cilia by governing growth and beating efficiency of motile cells                                                                                             | (Bonnafe, et al., 2004)                                 |
| GOLGA2<br>(0.95)   | Golgin subfamily A member 2                   | Functional role in sperm not reported<br>Involved in spermatogenesis: acrosome biogenesis                                                                                                                                                   | (Moreno, et al., 2000)                                  |
| FBL<br>(0.95)      | F Box protein                                 | Functional role in sperm not reported                                                                                                                                                                                                       |                                                         |

|                  |                                                                   |                                                                                                                                                                                                                                                          |                                                  |
|------------------|-------------------------------------------------------------------|----------------------------------------------------------------------------------------------------------------------------------------------------------------------------------------------------------------------------------------------------------|--------------------------------------------------|
| GIGYF2<br>(0.99) | PERQ amino acid-rich with<br>GYF domain-containing<br>protein 2 * | Functional role in sperm not reported<br>Present in testis<br>May involved in receptor signaling                                                                                                                                                         | (Giovannone, et al.,<br>2003)                    |
| UBC<br>(0.99)    | Polyubiquitin-C *                                                 | Sperm motility<br>Ubiquitin, a house-keeping protein that marks other proteins for<br>proteasomal degradation, tags defective sperm during epididymal<br>passage                                                                                         | (Rawe, et al., 2002)<br>(Sutovsky, et al., 2004) |
| TOB1<br>(0.98)   | Protein Tob1 *                                                    | Functional role in sperm not reported ?<br>Tob genes are expressed in oocytes, sperm, early embryos, and various<br>adult tissues, depending on the species. Tob proteins play important<br>roles in spermatogenesis, embryonic dorsoventral patterning. | Reviewed in (Jia and<br>Meng, 2007)              |
| ACRBP<br>(0.98)  | Acrosin-binding protein *                                         | Mediates acrosin activation and zona binding.<br>Involved in packaging and condensation of the acrosin zymogen in the<br>acrosomal matrix via its association with proacrosin                                                                            | (Veaute, et al., 2010)<br>(Tardif, et al., 2012) |
| BSCL2<br>(0.97)  | Seipin *                                                          | Functional role in sperm not reported<br>Seipin localization is specifically observed in spermatids and<br>absent in spermatozoa<br>Highly expressed in brain, testis and adipose tissue                                                                 | (Ito, et al., 2008)                              |

The transcripts were selected and compared based on the RNA seq data from human (Sendler et al., 2013) and stallion (Das, et al., 2013). The top 5% of the transcripts of the RNA seq data from human were compared with stallion (FPKM >40 )]

Orthologous genes were identified with Genomatix RegionMiner: Search for orthologous GeneIDs module

Only stallion, bovine were compared for abundance, as these are the only species for which equivalent RNA-seq data is available

\* represents genes which do not show required level of similarity to be classified as orthologous by this module, but which nevertheless share similar name to human transcript

# The functions were checked in [www.pubmed.com](http://www.pubmed.com), [www.iHop-net.com](http://www.iHop-net.com) and [www.uniprot.org](http://www.uniprot.org)

## References:

- Ariel M, Mccarrey J and Cedar H. Methylation Patterns of Testis-Specific Genes. *P Natl Acad Sci USA* 1991; **88**:2317-2321.
- Arun G, Akhade VS, Donakonda S and Rao MRS. mrhl RNA, a Long Noncoding RNA, Negatively Regulates Wnt Signaling through Its Protein Partner Ddx5/p68 in Mouse Spermatogonial Cells. *Mol Cell Biol* 2012; **32**:3140-3152.
- Bohgaki T, Bohgaki M, Cardoso R, Panier S, Zeegers D, Li L, Stewart GS, Sanchez O, Hande MP, Durocher D et al. Genomic Instability, Defective Spermatogenesis, Immunodeficiency, and Cancer in a Mouse Model of the RIDDLE Syndrome. *PLoS genetics* 2011; **7**.
- Bonnafe E, Touka M, AitLounis A, Baas D, Barras E, Ucla C, Moreau A, Flamant F, Dubruille R, Couble P et al. The transcription factor RFX3 directs nodal cilium development and left-right asymmetry specification. *Mol Cell Biol* 2004; **24**:4417-4427.
- Card C, Anderson EJ, Zamberlan S, Krieger KB, Kaproth M and Sartini BL. Cryopreserved Bovine Spermatozoal Transcript Profile as Revealed by High-Throughput Ribonucleic Acid Sequencing. *Biology of reproduction* 2013.
- Carim-Todd L, Escarceller M, Estivill X and Sumoy L. Identification and characterization of UBXD1, a novel UBX domain-containing gene on human chromosome 19p13, and its mouse ortholog. *Bba-Gene Struct Expr* 2001; **1517**:298-301.
- Chen XL, Zhu HB, Wu CJ, Han WD, Hao HS, Zhao XM, Du WH, Qin T, Liu Y and Wang D. Identification of differentially expressed proteins between bull X and Y spermatozoa. *J Proteomics* 2012; **77**:59-67.
- Chesneau V, Prat A, Segretain D, Hospital V, Dupaix A, Foulon T, Jegou B and Cohen P. NRD convertase: A putative processing endoprotease associated with the axoneme and the manchette in late spermatids. *Journal of cell science* 1996; **109**:2737-2745.
- Conti M, Nemoz G, Sette C and Vicini E. Recent progress in understanding the hormonal regulation of phosphodiesterases. *Endocrine reviews* 1995; **16**:370-389.
- Cordin O, Banroques J, Tanner NK and Linder P. The DEAD-box protein family of RNA helicases. *Gene* 2006; **367**:17-37.
- Couesnon A, Offner N, Bernard V, Chaverot N, Backer S, Dimitrov A, Perez F, Molgo J and Bloch-Gallego E. CLIPR-59: a protein essential for neuromuscular junction stability during mouse late embryonic development. *Development* 2013; **140**:1583-1593.
- Das PJ, McCarthy F, Vishnoi M, Paria N, Gresham C, Li G, Kachroo P, Sudderth AK, Teague S, Love CC et al. Stallion Sperm Transcriptome Comprises Functionally Coherent Coding and Regulatory RNAs as Revealed by Microarray Analysis and RNA-seq. *PloS one* 2013; **8**:e56535.
- Dimitrov S, Brennerova M and Forejt J. Expression profiles and intergenic structure of head-to-head oriented Brca1 and Nbr1 genes. *Gene* 2001; **262**:89-98.
- Doiguchi M, Mori T, Toshimori K, Shibata Y and Iida H. Spergen-1 might be an adhesive molecule associated with mitochondria in the middle piece of spermatozoa. *Developmental biology* 2002; **252**:127-137.
- Fisch JD, Behr B and Conti M. Enhancement of motility and acrosome activity reaction in human spermatozoa: differential activation by type-specific phosphodiesterase inhibitors (vol 13, pg 1248, 1998). *Human Reproduction* 1999; **14**:575-575.
- Fraser LR, Hosseini R, Hanyalogou A, Talmor A and Dudley RK. TCP-11, the product of a mouse t-complex gene, plays a role in stimulation of capacitation and inhibition of the spontaneous acrosome reaction. *Mol Reprod Dev* 1997; **48**:375-382.
- Giovannone B, Lee E, Laviola L, Giorgino F, Cleveland KA and Smith RJ. Two novel proteins that are linked to insulin-like growth factor (IGF-I) receptors by the Grb10 adapter and modulate IGF-I signaling. *Journal of Biological Chemistry* 2003; **278**:31564-31573.

Hafizur RM, Yano M, Gotoh T, Mori M and Terada K. Modulation of chaperone activities of Hsp70 and Hsp70-2 by a mammalian DnaJ/Hsp40 homolog, DjA4. *Journal of biochemistry* 2004; **135**:193-200.

Hayashi E, Matsuzaki Y, Hasegawa G, Yaguchi T, Kurihara S, Fujita T, Kageshita T, Sano M and Kawakami Y. Identification of a novel cancer-testis antigen CRT2 frequently expressed in various cancers using representational differential analysis. *Clinical Cancer Research* 2007; **13**:6267-6274.

Ikawa M, Wada I, Kominami K, Watanabe D, Toshimori K, Nishimune Y and Okabe M. The putative chaperone calmeglin is required for sperm fertility. *Nature* 1997; **387**:607-611.

Itman C, Wong C, Whiley PA, Fernando D and Loveland KL. TGFbeta superfamily signaling regulators are differentially expressed in the developing and adult mouse testis. *Spermatogenesis* 2011; **1**:63-72.

Ito D, Fujisawa T, Iida H and Suzuki N. Characterization of seipin/BSCL2, a protein associated with spastic paraplegia 17. *Neurobiology of disease* 2008; **31**:266-277.

Jia S and Meng A. Tob genes in development and homeostasis. *Developmental dynamics : an official publication of the American Association of Anatomists* 2007; **236**:913-921.

Khatchadourian K, Smith CE, Metzler M, Gregory M, Hayden MR, Cyr DG and Hermo L. Structural abnormalities in spermatids together with reduced sperm counts and motility underlie the reproductive defect in HIP1(-/-) mice. *Molecular reproduction and development* 2007; **74**:341-359.

Kotaja N, Lin HF, Parvinen M and Sassone-Corsi P. Interplay of PIWI/Argonaute protein MIWI and kinesin KIF17b in chromatoid bodies of male germ cells. *Journal of cell science* 2006; **119**:2819-2825.

Kotaja N, Macho B and Sassone-Corsi P. Microtubule-independent and protein kinase A-mediated function of kinesin KIF17b controls the intracellular transport of activator of CREM in testis (ACT). *Journal of Biological Chemistry* 2005; **280**:31739-31745.

Kuroda M, Sok J, Webb L, Baechtold H, Urano F, Yin Y, Chung P, de Rooij DG, Akhmedov A, Ashley T et al. Male sterility and enhanced radiation sensitivity in TLS-/- mice. *Embo Journal* 2000; **19**:453-462.

Li DQ, Nair SS, Ohshiro K, Kumar A, Nair VS, Pakala SB, Reddy SD, Gajula RP, Eswaran J, Aravind L et al. MORC2 signaling integrates phosphorylation-dependent, ATPase-coupled chromatin remodeling during the DNA damage response. *Cell reports* 2012; **2**:1657-1669.

Li HY and Zhang H. Proteome analysis for profiling infertility markers in male mouse sperm after carbon ion radiation. *Toxicology* 2013; **306C**:85-92.

Lin RY, Moss SB and Rubin CS. Characterization of S-AKAP84, a novel developmentally regulated A kinase anchor protein of male germ cells. *The Journal of biological chemistry* 1995; **270**:27804-27811.

Loveland KL, Hogarth C, Szczepny A, Prabhu SM and Jans DA. Expression of nuclear transport importins beta 1 and beta 3 is regulated during rodent spermatogenesis. *Biology of reproduction* 2006; **74**:67-74.

Menegay H, Moeslein F and Landreth G. The dual specificity protein kinase CLK3 is abundantly expressed in mature mouse spermatozoa. *Exp Cell Res* 1999; **253**:463-473.

Miki K, Qu WD, Goulding EH, Willis WD, Bunch DO, Strader LF, Perreault SD, Eddy EM and O'Brien DA. Glyceraldehyde 3-phosphate dehydrogenase-S, a sperm-specific glycolytic enzyme, is required for sperm motility and male fertility. *P Natl Acad Sci USA* 2004; **101**:16501-16506.

Moreno RD, Ramalho-Santos J, Sutovsky P, Chan EKL and Schatten G. Vesicular traffic and Golgi apparatus dynamics during mammalian spermatogenesis: Implications for acrosome architecture. *Biology of reproduction* 2000; **63**:89-98.

Nagamori I, Yabuta N, Fujii T, Tanaka H, Yomogida K, Nishimune Y and Nojima H. Tisp40, a spermatid specific bZip transcription factor, functions by binding to the unfolded protein response element via the Rip pathway. *Genes Cells* 2005; **10**:575-594.

Ranganathan S, Ganguly AK and Datta K. Evidence for Presence of Hyaluronan-Binding Protein on Spermatozoa and Its Possible Involvement in Sperm Function. *Molecular reproduction and development* 1994; **38**:69-76.

Rawe VY, Olmedo SB, Benmusa A, Shiigi SM, Chemes HE and Sutovsky P. Sperm ubiquitination in patients with dysplasia of the fibrous sheath. *Human reproduction* 2002; **17**:2119-2127.

Rezende NC, Lee MY, Monette S, Mark W, Lu AL and Gudas LJ. Rex1 (Zfp42) null mice show impaired testicular function, abnormal testis morphology, and aberrant gene expression. *Developmental biology* 2011; **356**:370-382.

Ronfani L, Ferraguti M, Croci L, Ovitt CE, Scholer HR, Consalez GG and Bianchi ME. Reduced fertility and spermatogenesis defects in mice lacking chromosomal protein Hmgb2. *Development* 2001; **128**:1265-1273.

Shackelford GM and Varmus HE. Expression of the proto-oncogene int-1 is restricted to postmeiotic male germ cells and the neural tube of mid-gestational embryos. *Cell* 1987; **50**:89-95.

Stefansson B and Brautigan DL. Protein phosphatase 6 subunit with conserved sit4-associated protein domain targets I kappa B epsilon. *Journal of Biological Chemistry* 2006; **281**:22624-22634.

Sutovsky P, Hauser R and Sutovsky M. Increased levels of sperm ubiquitin correlate with semen quality in men from an andrology laboratory clinic population. *Human reproduction* 2004; **19**:628-638.

Tardif S, Guyonnet B, Cormier N and Cornwall GA. Alteration in the processing of the ACRBP/sp32 protein and sperm head/acrosome malformations in proprotein convertase 4 (PCSK4) null mice. *Mol Hum Reprod* 2012; **18**:298-307.

Tarnasky H, Cheng M, Ou Y, Thundathil JC, Oko R and van der Hoorn FA. Gene trap mutation of murine Outer dense fiber protein-2 gene can result in sperm tail abnormalities in mice with high percentage chimaerism. *Bmc Dev Biol* 2010; **10**.

Tokuhiro K, Isotani A, Yokota S, Yano Y, Oshio S, Hirose M, Wada M, Fujita K, Ogawa Y, Okabe M et al. OAZ-t/OAZ3 Is Essential for Rigid Connection of Sperm Tails to Heads in Mouse. *PLoS genetics* 2009; **5**.

Veaute C, Liu de Y, Furlong LI, Biancotti JC, Baker HW and Vazquez-Levin MH. Anti-human proacrosin antibody inhibits the zona pellucida (ZP)-induced acrosome reaction of ZP-bound spermatozoa. *Fertil Steril* 2010; **93**:2456-2459.

Xiao N, Kam C, Shen C, Jin WY, Wang JQ, Lee KM, Jiang LW and Xia J. PICK1 deficiency causes male infertility in mice by disrupting acrosome formation. *J Clin Invest* 2009; **119**:802-812.

Yadav N, Lee J, Kim J, Shen JJ, Hu MCT, Aldaz CM and Bedford MT. Specific protein methylation defects and gene expression perturbations in coactivator-associated arginine methyltransferase 1-deficient mice. *P Natl Acad Sci USA* 2003; **100**:6464-6468.

Yamagata K, Nakanishi T, Ikawa M, Yamaguchi R, Moss SB and Okabe M. Sperm from the calmegin-deficient mouse have normal abilities for binding and fusion to the egg plasma membrane. *Developmental biology* 2002; **250**:348-357.

Yamaguchi N, Takanezawa Y, Koizumi H, Umezu-Goto M, Aoki J and Arai H. Expression of NUDEL in manchette and its implication in spermatogenesis. *Febs Lett* 2004; **566**:71-76.



Yuan W, Leisner TM, McFadden AW, Clark S, Hiller S, Maeda N, O'Brien DA and Parise LV. CIB1 is essential for mouse spermatogenesis. *Mol Cell Biol* 2006; **26**:8507-8514.

Zhang J, Wang Y, Zhou Y, Cao ZG, Huang PT and Lu BS. Yeast two-hybrid screens imply that GGNBP1, GGNBP2 and OAZ3 are potential interaction partners of testicular germ cell-specific protein GGN1. *Febs Lett* 2005; **579**:559-566.

ZHANG Mian-qiu BA-m, GUO Xue-jiang,ZHU Hui ,ZHOU Zuo-ming Expression and localization of REEP6 in human testis and sperm *Acta Universitatis Medicinalis* 2011.

Zhu H, Cui YG, Xie J, Chen L, Chen XX, Guo XJ, Zhu YF, Wang XH, Tong JS, Zhou ZM et al. Proteomic analysis of testis biopsies in men treated with transient scrotal hyperthermia reveals the potential targets for contraceptive development. *Proteom Clin Appl* 2011; **5**:191-191.
